# Supplementary material for: Three selective and sensitive “off–on” probes based on rhodamine for Fe3+ imaging in living cells
Source: Royal Society of Chemistry journal article supplement (doi:10.1039/c4ra00396a), 2014-01-01
Supplement: c4ra00396a1.pdf [file c4ra00396a1.pdf]

## Supplementary Material

### Three selective and sensitive “off-on” probes based on rhodamine for Fe<sup>3+</sup> imaging in living cells

Meipan Yang, Chengchao Xu, Shaoni Li, Zhao Cheng, Jia Zhou, Bingqin Yang\*

*Key Laboratory of Synthetic and Natural Functional Molecule Chemistry, Ministry of Education,  
College of Chemistry and Materials Science, Northwest University, Xi'an 710069, PR China*

\* Corresponding author: Bingqin Yang

Tel.: +0086 29 88302217

Fax: +0086 29 88302617

E-mail: yangbq@nwu.edu.cn; ymp1111@163.com

#### Table of contents

1. X-ray Tables of compounds **3a-c**
2. X-ray crystal structures of **3b** (a) and **3c** (b)
3. Spectroscopic properties
4. <sup>1</sup>H NMR, <sup>13</sup>C NMR and MS spectra

Table S1 X-ray Tables of compounds **3a-c**

|                                                   |                                                                                     |
|---------------------------------------------------|-------------------------------------------------------------------------------------|
| Compound                                          | <b>3a</b>                                                                           |
| Formula                                           | C <sub>36</sub> H <sub>35</sub> N <sub>5</sub> O <sub>2</sub> S                     |
| Formula weight                                    | 601.25                                                                              |
| Temperature (K)                                   | 296(2)                                                                              |
| Wavelength (Å)                                    | 0.71073                                                                             |
| Crystal system                                    | Monoclinic                                                                          |
| space group                                       | P2(1)/c                                                                             |
| Unit cell dimensions /(Å, °)                      | a = 16.334 (3)    α= 90<br>b = 12.039(2)    β= 109.258(3)<br>c = 16.574(3)    γ= 90 |
| Volume (Å <sup>3</sup> )                          | 3076.9(10)                                                                          |
| Z                                                 | 40                                                                                  |
| Calculated density (Mg/m <sup>3</sup> )           | 1.621                                                                               |
| Absorption coefficient (mm <sup>-1</sup> )        | 0.775                                                                               |
| F(000)                                            | 1520                                                                                |
| Crystal size (mm <sup>3</sup> )                   | 0.35 x 0.33 x 0.24                                                                  |
| Theta range for data collection (°)               | 2.13 - 25.10                                                                        |
| Limiting indices                                  | -18<=h<=19<br>-9<=k<=14<br>-19<=l<=18                                               |
| Reflections collected / unique                    | 15110 / 5473 [R(int) = 0.0437]                                                      |
| Completeness to θ = 25.10                         | 99.8 %                                                                              |
| Max. and min. transmission                        | 0.9726 and 0.9614                                                                   |
| Refinement method                                 | Full-matrix least-squares on F <sup>2</sup>                                         |
| Data / restraints / parameters                    | 5473 / 0 / 401                                                                      |
| Goodness-of-fit on F <sup>2</sup>                 | 1.049                                                                               |
| Final R indices [I>2σ (I)]                        | R1 = 0.0551, wR2 = 0.1402                                                           |
| R indices (all data)                              | R1 = 0.0857, wR2 = 0.1607                                                           |
| Largest diff. peak and hole/(e. Å <sup>-3</sup> ) | 0.397 and -0.299                                                                    |
| CCDC                                              | 979338                                                                              |

|                                                   |                                                                                        |
|---------------------------------------------------|----------------------------------------------------------------------------------------|
| Compound                                          | <b>3b</b>                                                                              |
| Formula                                           | C <sub>37</sub> H <sub>37</sub> N <sub>5</sub> O <sub>3</sub> S                        |
| Formula weight                                    | 631.26                                                                                 |
| Temperature (K)                                   | 296(2)                                                                                 |
| Wavelength (Å)                                    | 0.71073                                                                                |
| Crystal system                                    | Monoclinic                                                                             |
| space group                                       | Cc                                                                                     |
| Unit cell dimensions /(Å, °)                      | a = 28.380(6)    α = 90<br>b = 17.275(6)    β = 129.802(10)<br>c = 19.574(7)    γ = 90 |
| Volume (Å <sup>3</sup> )                          | 7373(4)                                                                                |
| Z                                                 | 8                                                                                      |
| Calculated density (Mg/m <sup>3</sup> )           | 1.138                                                                                  |
| Absorption coefficient (mm <sup>-1</sup> )        | 0.128                                                                                  |
| F(000)                                            | 2672                                                                                   |
| Crystal size (mm <sup>3</sup> )                   | 0.36 x 0.30 x 0.24                                                                     |
| Theta range for data collection (°)               | 1.50 - 25.10                                                                           |
| Limiting indices                                  | -33 ≤ h ≤ 32<br>-20 ≤ k ≤ 15<br>-23 ≤ l ≤ 23                                           |
| Reflections collected / unique                    | 18377 / 6565 [R(int) = 0.1492]                                                         |
| Completeness to θ = 25.10                         | 99.9 %                                                                                 |
| Max. and min. transmission                        | 0.9697 and 0.9557                                                                      |
| Refinement method                                 | Full-matrix least-squares on F <sup>2</sup>                                            |
| Data / restraints / parameters                    | 6565 / 0 / 421                                                                         |
| Goodness-of-fit on F <sup>2</sup>                 | 1.011                                                                                  |
| Final R indices [I > 2σ (I)]                      | R1 = 0.1379, wR2 = 0.3309                                                              |
| R indices (all data)                              | R1 = 0.2844, wR2 = 0.4167                                                              |
| Largest diff. peak and hole/(e. Å <sup>-3</sup> ) | 1.094 and -0.462                                                                       |
| CCDC                                              | 979341                                                                                 |

|                                                      |                                                                                                 |
|------------------------------------------------------|-------------------------------------------------------------------------------------------------|
| Compound                                             | <b>3c</b>                                                                                       |
| Formula                                              | C <sub>36</sub> H <sub>34</sub> N <sub>6</sub> O <sub>4</sub> S                                 |
| Formula weight                                       | 646.24                                                                                          |
| Temperature (K)                                      | 296(2)                                                                                          |
| Wavelength (Å)                                       | 0.71073                                                                                         |
| Crystal system                                       | Triclinic                                                                                       |
| space group                                          | P-1                                                                                             |
| Unit cell dimensions /(Å, °)                         | a = 9.558(2)     α= 74.955(5)<br>b = 12.296(3)    β= 82.177(5)<br>c = 14.954(4)    γ= 72.016(5) |
| Volume (Å <sup>3</sup> )                             | 1611.3(7)                                                                                       |
| Z                                                    | 2                                                                                               |
| Calculated density (Mg/m <sup>3</sup> )              | 1.333                                                                                           |
| Absorption coefficient (mm <sup>-1</sup> )           | 0.151                                                                                           |
| F(000)                                               | 680                                                                                             |
| Crystal size (mm <sup>3</sup> )                      | 0.36 x 0.31 x 0.25                                                                              |
| Theta range for data collection (°)                  | 1.41 - 26.66                                                                                    |
| Limiting indices                                     | -11 ≤ h ≤ 11<br>-15 ≤ k ≤ 14<br>-18 ≤ l ≤ 14                                                    |
| Reflections collected / unique                       | 9063 / 6470 [ <i>R</i> (int) = 0.0417]                                                          |
| Completeness to θ = 25.10                            | 95.2 %                                                                                          |
| Max. and min. transmission                           | 0.9627 and 0.9473                                                                               |
| Refinement method                                    | Full-matrix least-squares on <i>F</i> <sup>2</sup>                                              |
| Data / restraints / parameters                       | 6470 / 0 / 428                                                                                  |
| Goodness-of-fit on <i>F</i> <sup>2</sup>             | 1.025                                                                                           |
| Final <i>R</i> indices [ <i>I</i> > 2σ ( <i>I</i> )] | <i>R</i> 1 = 0.0741, <i>wR</i> 2 = 0.1822                                                       |
| <i>R</i> indices (all data)                          | <i>R</i> 1 = 0.1530, <i>wR</i> 2 = 0.2351                                                       |
| Largest diff. peak and hole/(e. Å <sup>-3</sup> )    | 0.607 and -0.290                                                                                |
| CCDC                                                 | 979339                                                                                          |

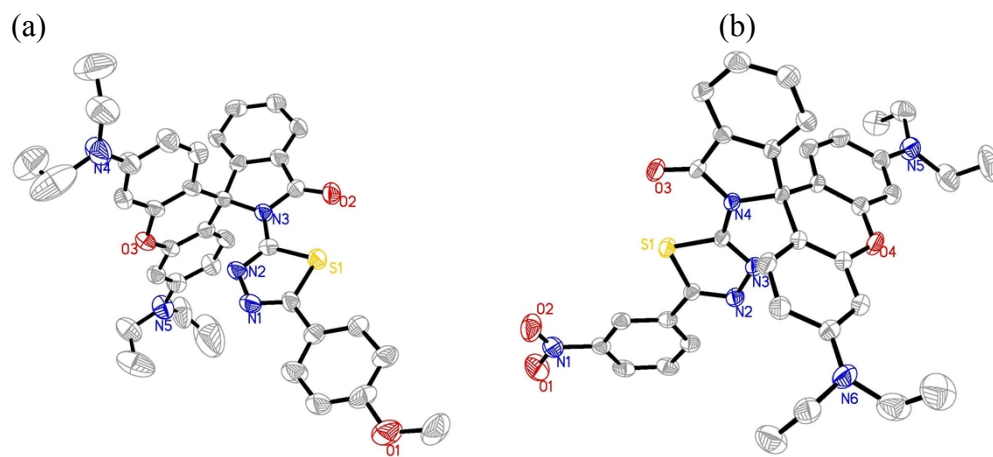

Fig. S1 X-ray crystal structures of **3b** (a) and **3c** (b).

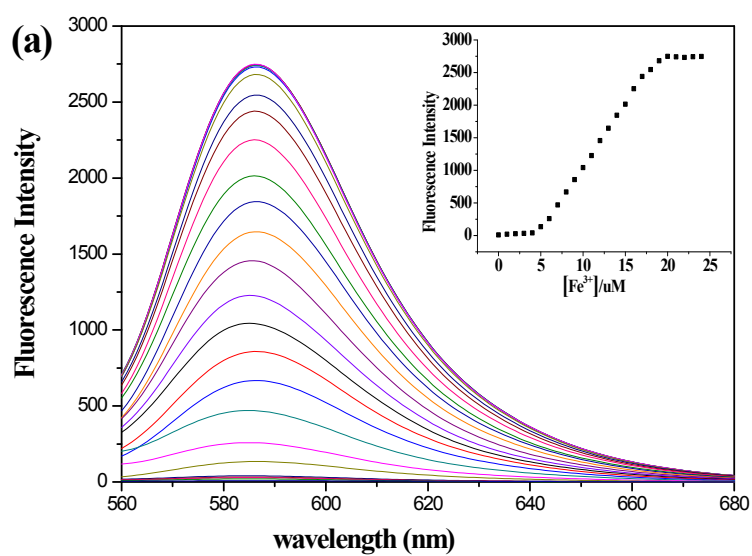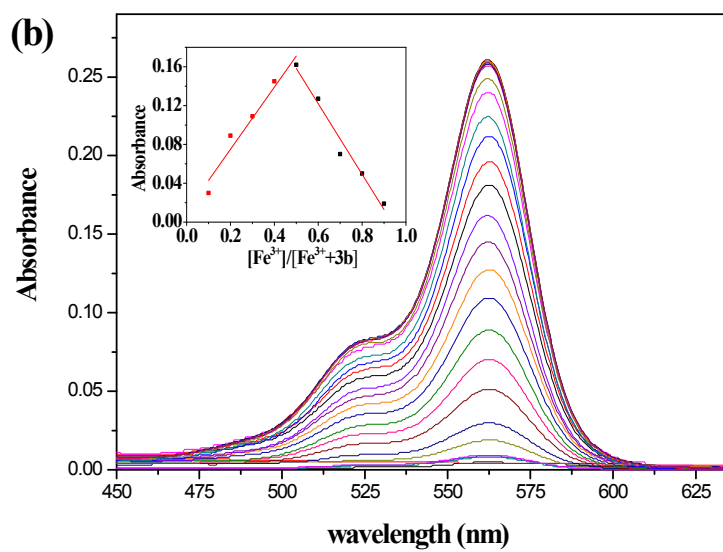

Fig. S2 Fluorescence intensity (a) and absorption (b) changes of **3b** (20  $\mu\text{M}$ ) upon addition of  $\text{Fe}^{3+}$  in methanol-water (4/6, v/v) solution. Inset: (a) Changes of emission intensity at 583 nm.  $\lambda_{\text{ex}}=555$  nm. (b) Job's plot of **3b** and  $\text{Fe}^{3+}$ .

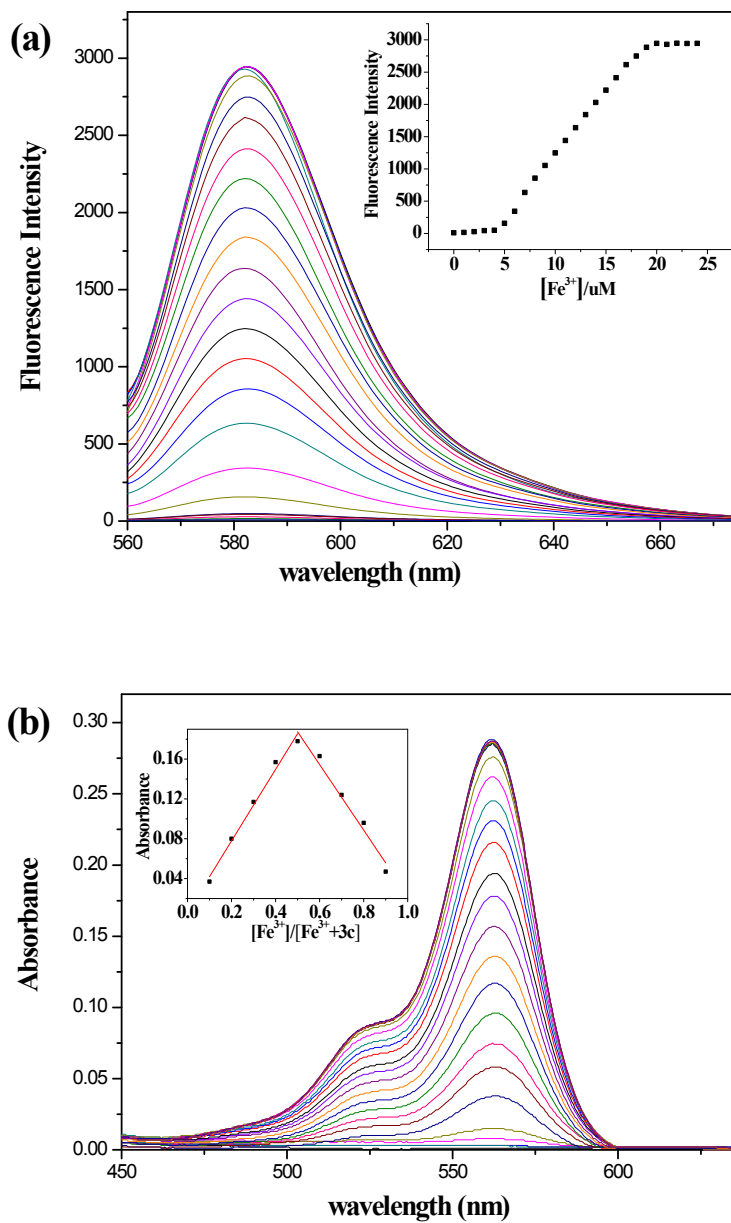

Fig. S3 Fluorescence intensity (a) and absorption (b) changes of **3c** (20 μM) upon addition of Fe<sup>3+</sup> in methanol-water (4/6, v/v) solution. Inset: (a) Changes of emission intensity at 582 nm,  $\lambda_{\text{ex}}=555$  nm. (b) Job's plot of **3c** and Fe<sup>3+</sup>.

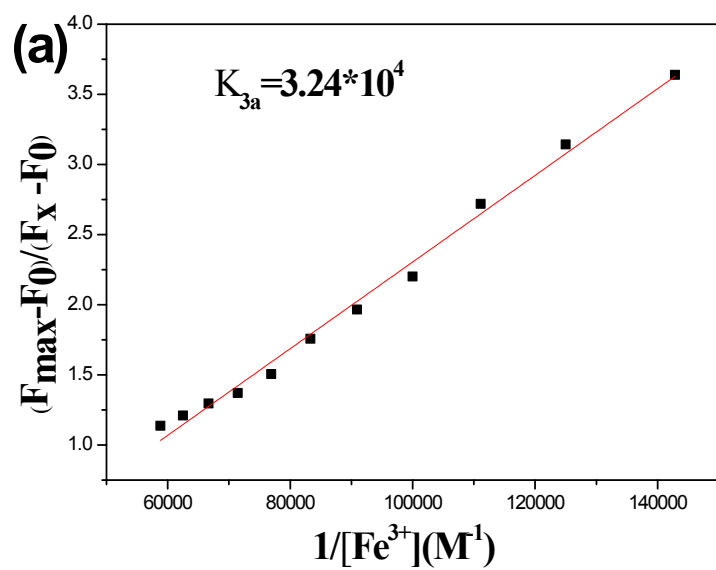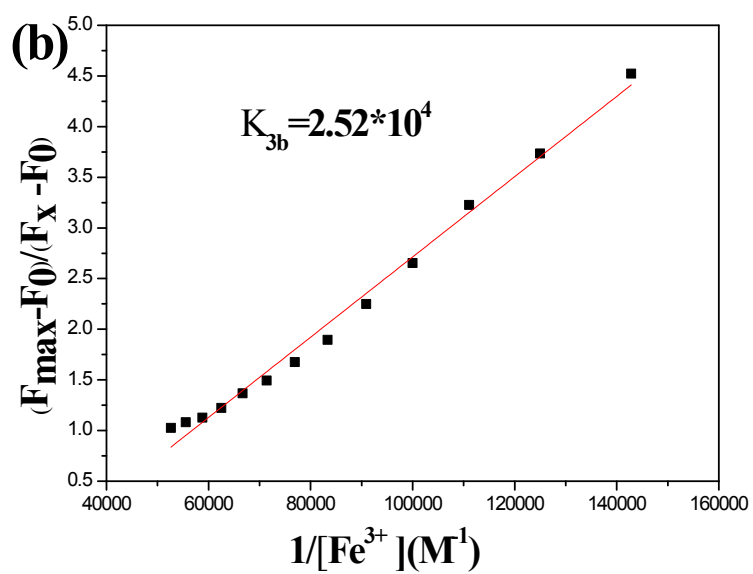



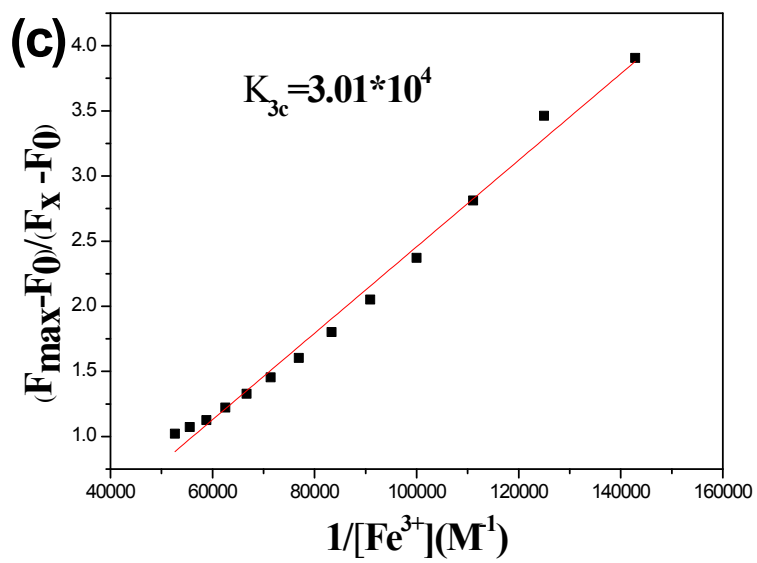

Fig. S4 Determination of binding constant of **3a** (a), **3b** (b) and **3c** (c) (20  $\mu\text{M}$ ) with  $\text{Fe}^{3+}$  (20  $\mu\text{M}$ ) using Benesi–Hildebrand equation.

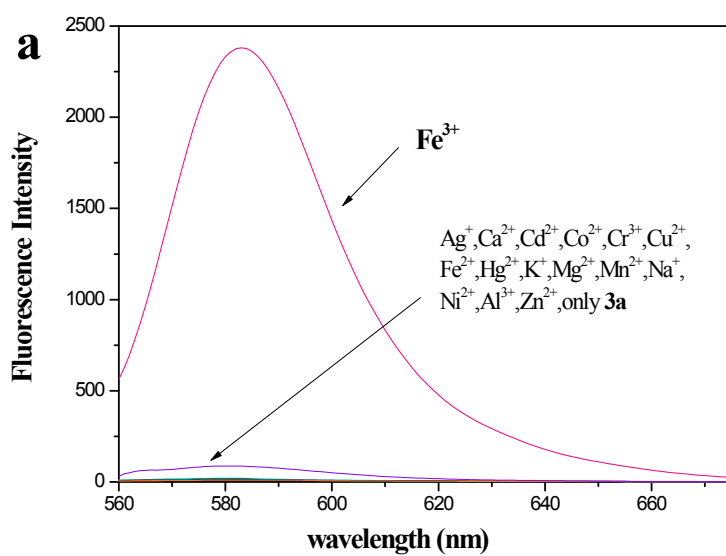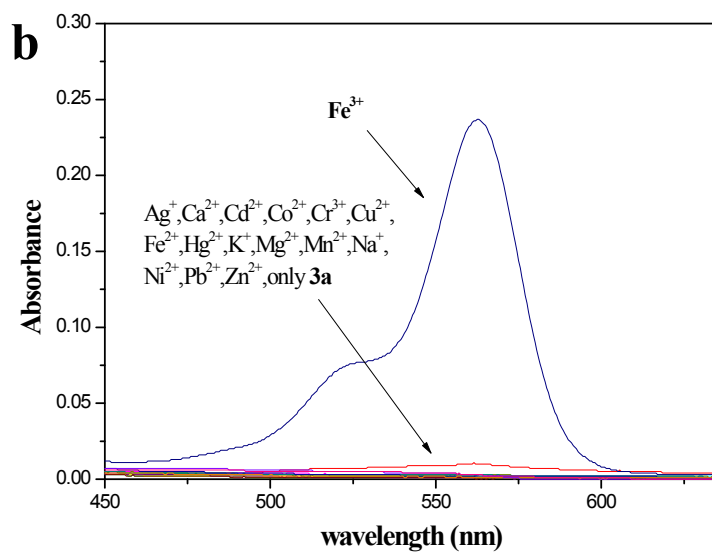

Fig.S5 Fluorescence (a) and absorption (b) spectra of **3a** (20  $\mu\text{M}$ ) in methanol-water (4/6, v/v) solution upon addition of various metal ions (20  $\mu\text{M}$ ),  $\lambda_{\text{ex}}=555$  nm.

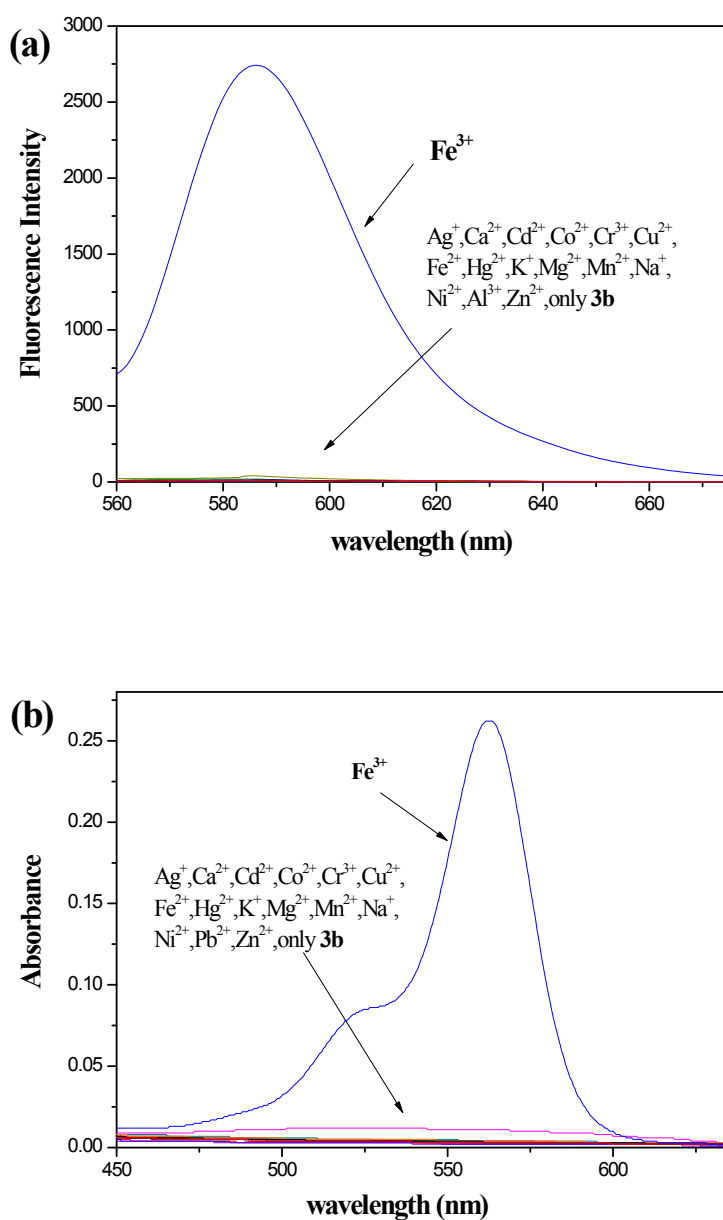

Fig. S6 Fluorescence (a) and absorption (b) spectra of **3b** (20  $\mu\text{M}$ ) in methanol-water (4/6, v/v) solution upon addition of various metal ions (20  $\mu\text{M}$ ),  $\lambda_{\text{ex}}=555$  nm.

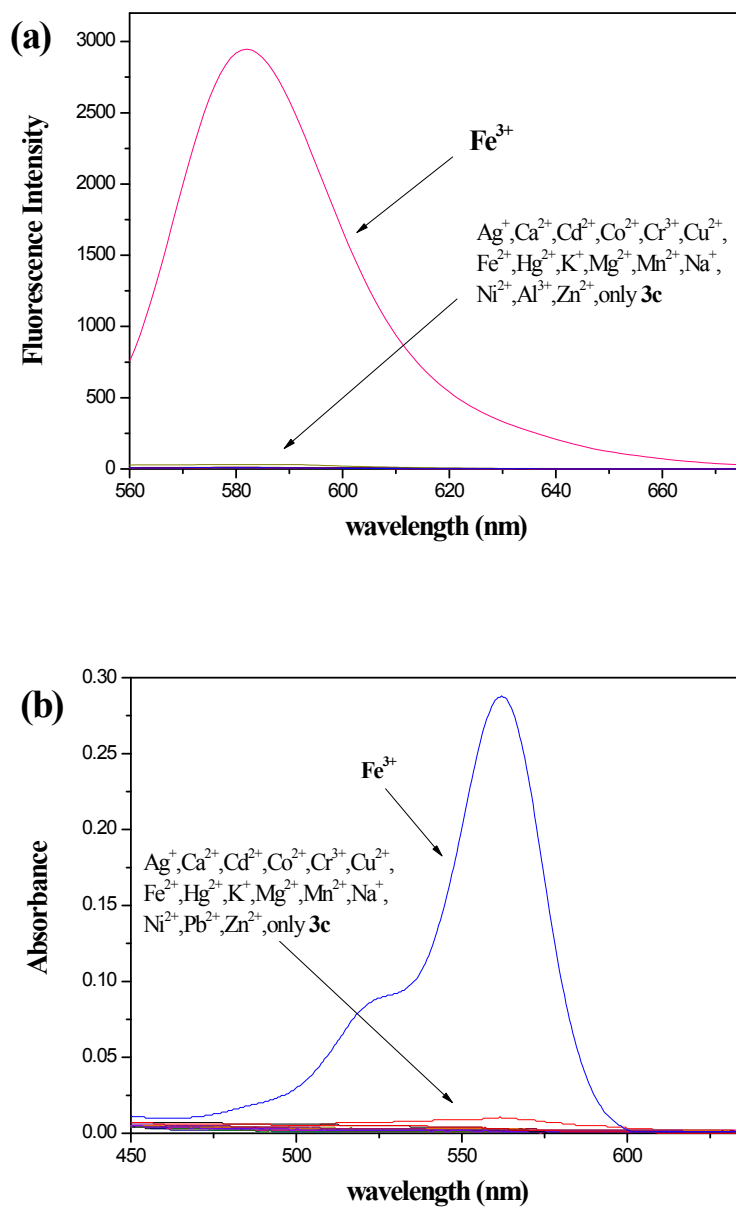

Fig. S7 Fluorescence (a) and absorption (b) spectra of **3c** (20  $\mu\text{M}$ ) in methanol-water (4/6, v/v) solution upon addition of various metal ions (20  $\mu\text{M}$ ),  $\lambda_{\text{ex}}=555$  nm.

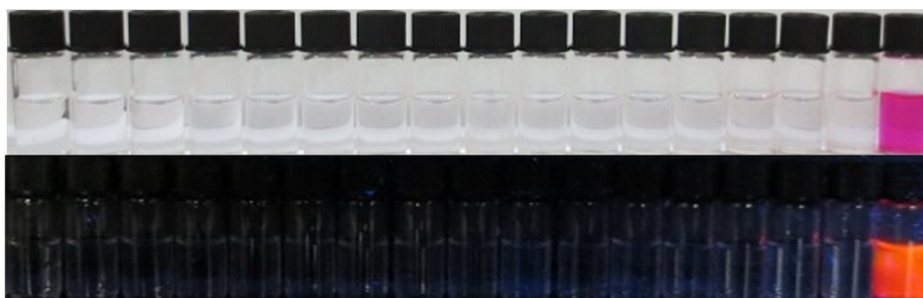

Fig. S8 Pictures of **3b** as a selective naked-eye probe (top) and the visual fluorescence emissions by using a UV lamp (365 nm) (bottom) for Fe<sup>3+</sup>. From the left to right: blank, Ag<sup>+</sup>, Na<sup>+</sup>, K<sup>+</sup>, Ca<sup>2+</sup>, Cd<sup>2+</sup>, Mg<sup>2+</sup>, Co<sup>2+</sup>, Mn<sup>2+</sup>, Cu<sup>2+</sup>, Al<sup>3+</sup>, Zn<sup>2+</sup>, Ni<sup>2+</sup>, Fe<sup>2+</sup>, Hg<sup>2+</sup>, Cr<sup>3+</sup> and Fe<sup>3+</sup> ions.

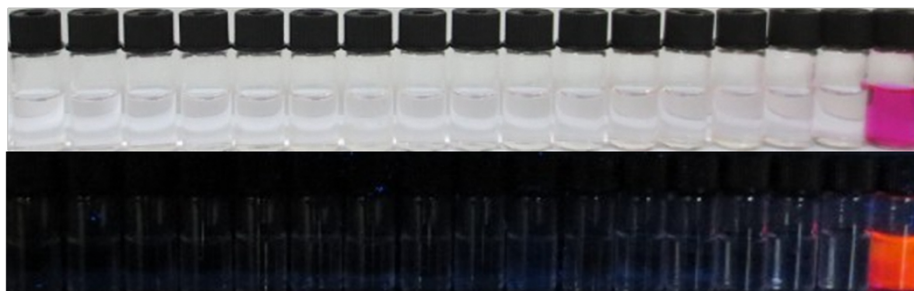

Fig. S9 Pictures of **3c** as a selective naked-eye probe (top) and the visual fluorescence emissions by using a UV lamp (365 nm) (bottom) for Fe<sup>3+</sup>. From the left to right: blank, Ag<sup>+</sup>, Na<sup>+</sup>, K<sup>+</sup>, Ca<sup>2+</sup>, Cd<sup>2+</sup>, Mg<sup>2+</sup>, Co<sup>2+</sup>, Mn<sup>2+</sup>, Cu<sup>2+</sup>, Al<sup>3+</sup>, Zn<sup>2+</sup>, Ni<sup>2+</sup>, Fe<sup>2+</sup>, Hg<sup>2+</sup>, Cr<sup>3+</sup> and Fe<sup>3+</sup> ions.

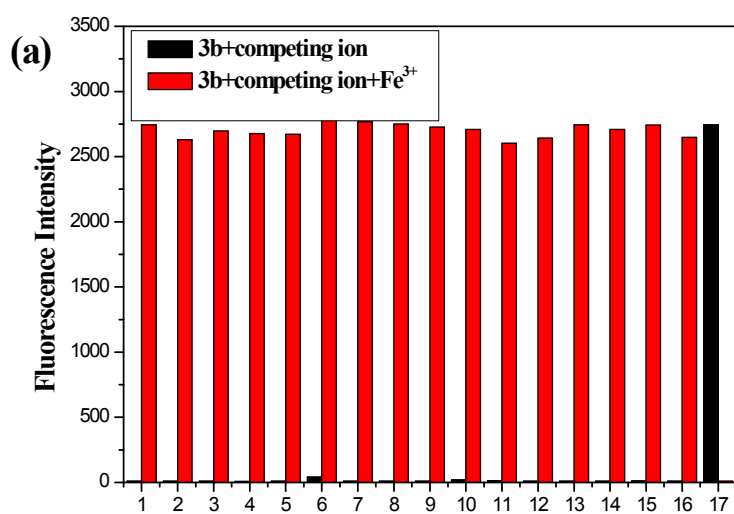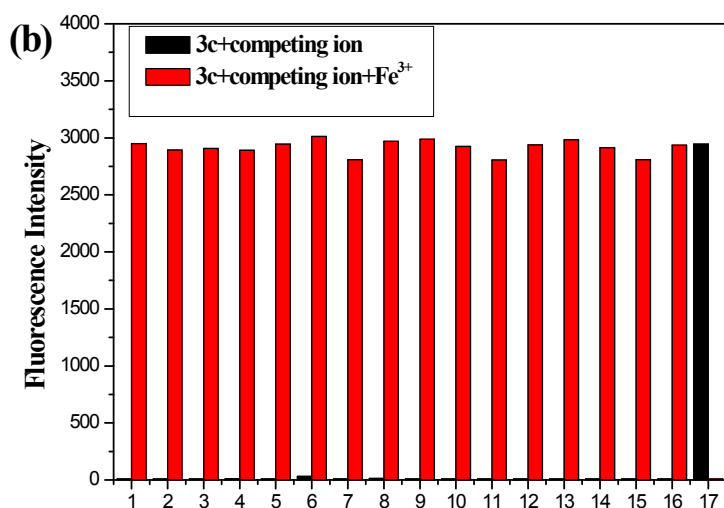

Fig. S10 Fluorescence intensity changes of **3b** (a) and **3c** (b) (20  $\mu\text{M}$ ) upon the addition of various metal ions (20  $\mu\text{M}$ ) in and without the presence of  $\text{Fe}^{3+}$  (20  $\mu\text{M}$ ) in methanol-water (4/6, v/v) solution. The black bars represent the fluorescence response of **3b/3c** and competing ions: 1.blank, 2. $\text{Na}^+$ , 3. $\text{Ca}^{2+}$ , 4. $\text{Mg}^{2+}$ , 5. $\text{Cd}^{2+}$ , 6. $\text{Mn}^{2+}$ , 7. $\text{Ni}^{2+}$ , 8. $\text{Co}^{2+}$ , 9. $\text{Zn}^{2+}$ , 10. $\text{Cu}^{2+}$ , 11. $\text{Cr}^{3+}$ , 12. $\text{Pb}^{2+}$ , 13. $\text{Ag}^+$ , 14. $\text{Fe}^{2+}$ , 15. $\text{Hg}^{2+}$ , 16. $\text{K}^+$ , 17. $\text{Fe}^{3+}$ . The red bars represent the subsequent addition of 20  $\mu\text{M}$   $\text{Fe}^{3+}$  to the above solutions.

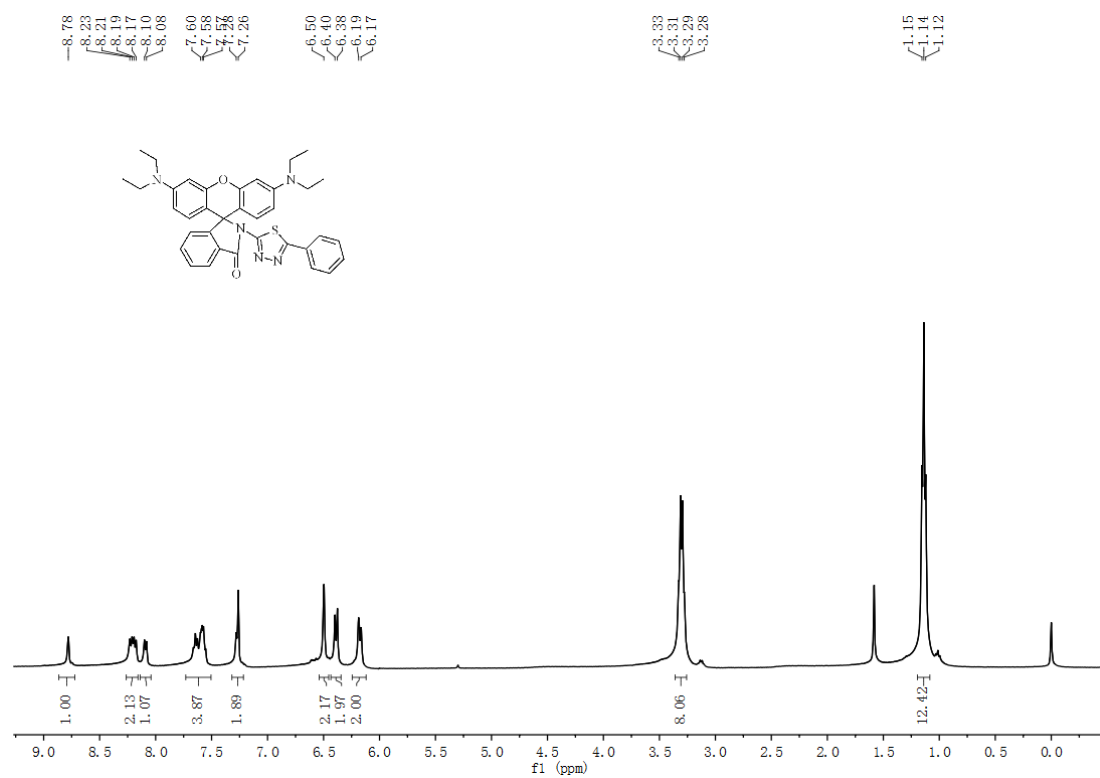

Fig. S11 <sup>1</sup>H NMR spectrum of **3a** in CDCl<sub>3</sub>.



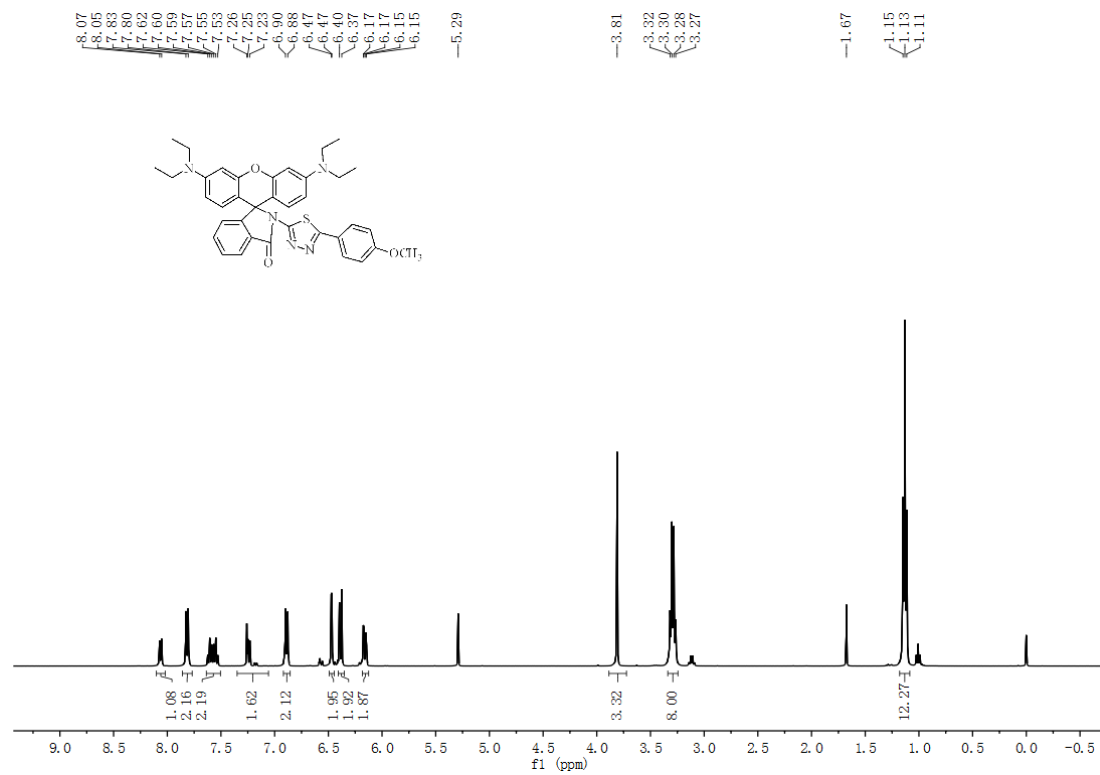

Fig. S12 <sup>1</sup>H NMR spectrum of **3b** in CDCl<sub>3</sub>.

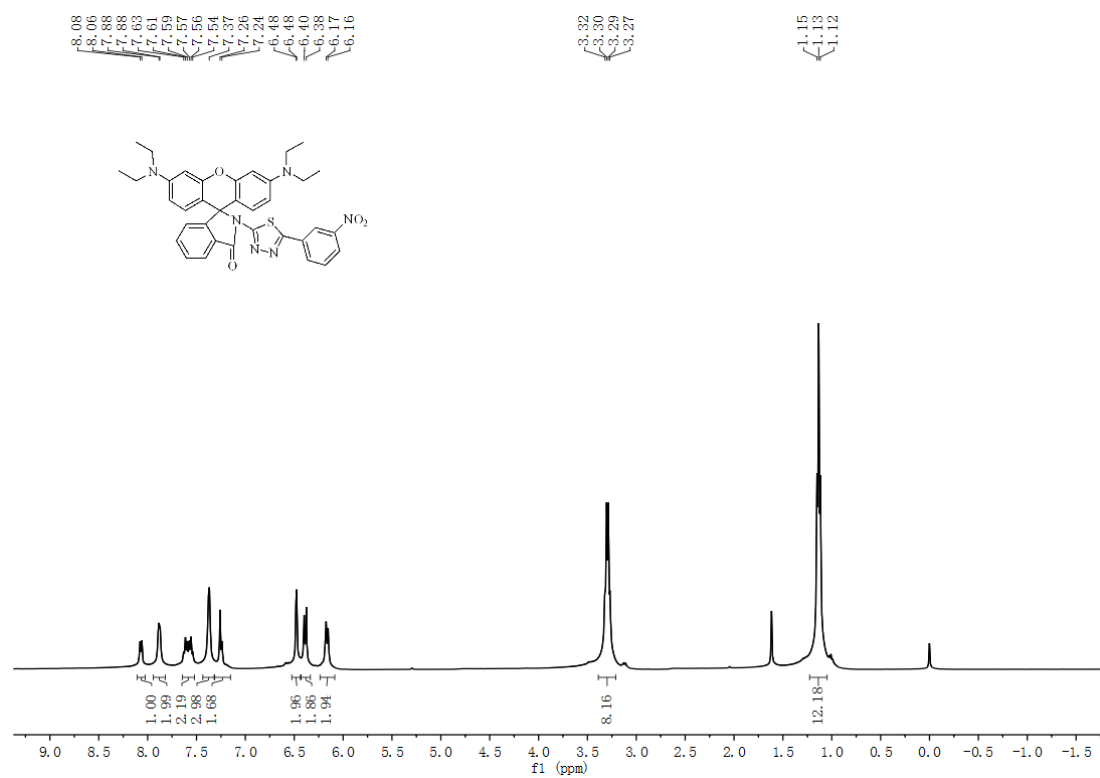

Fig. S13 <sup>1</sup>H NMR spectrum of **3c** in CDCl<sub>3</sub>.

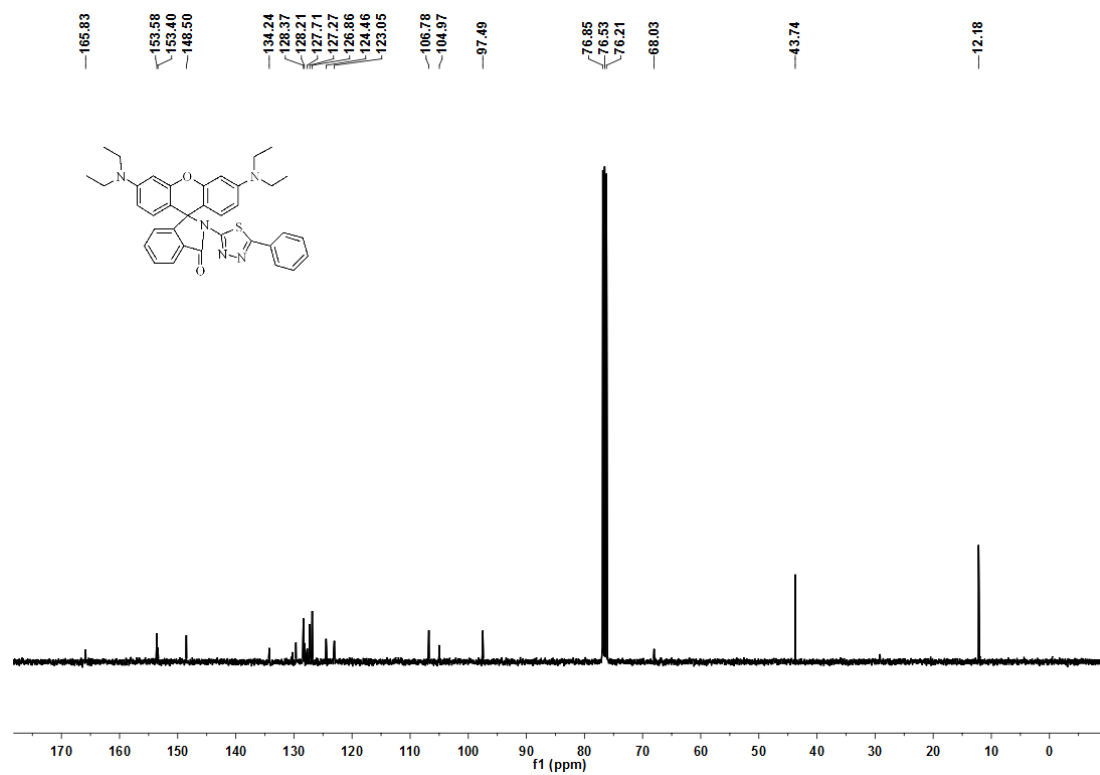

Fig. S14  $^{13}\text{C}$  NMR spectrum of **3a** in  $\text{CDCl}_3$ .

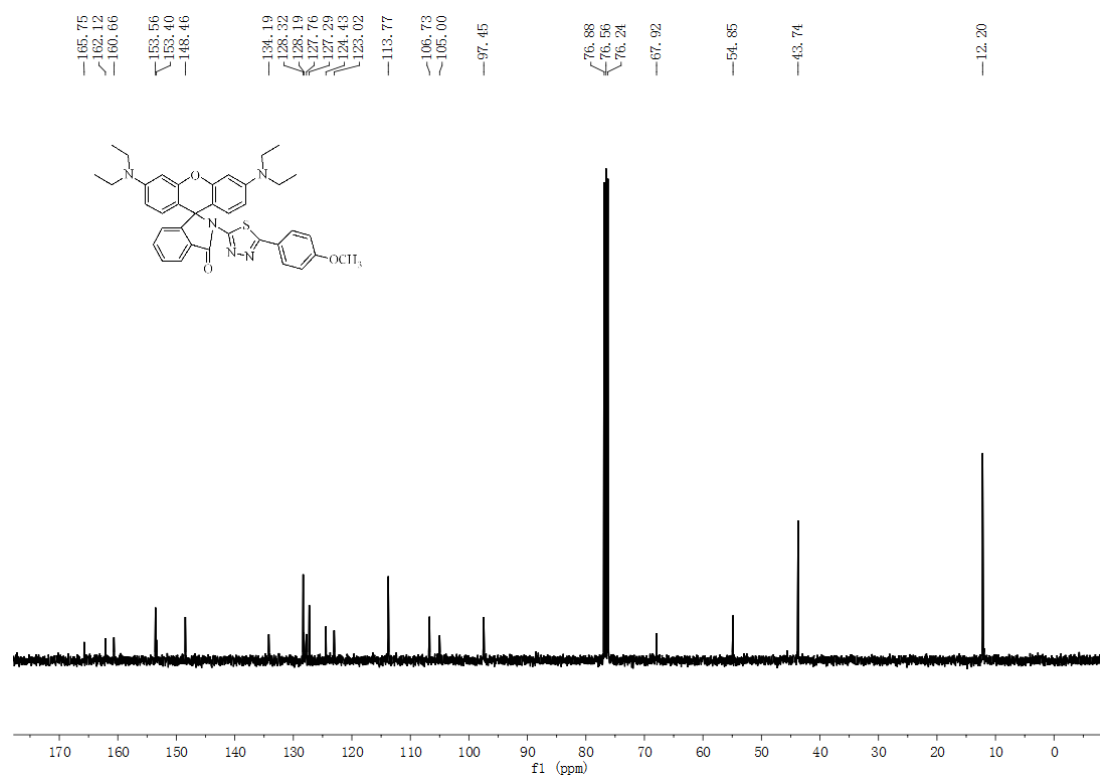

Fig. S15 <sup>13</sup>C NMR spectrum of **3b** in CDCl<sub>3</sub>.

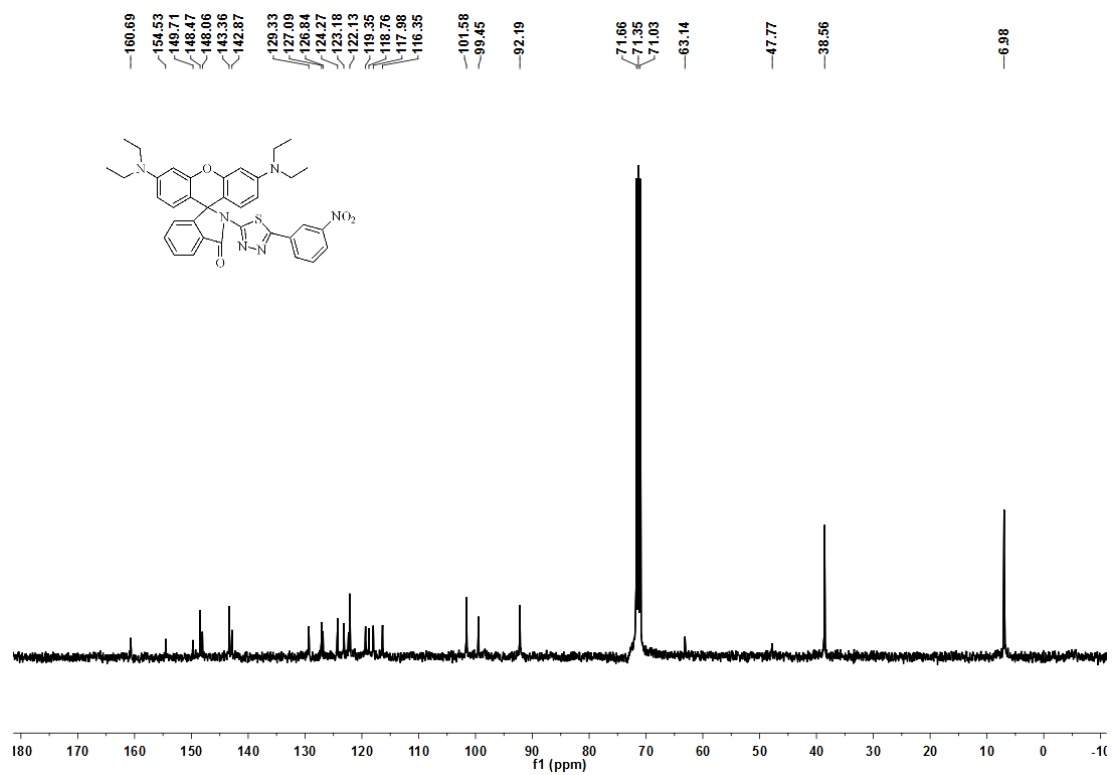

Fig. S16 <sup>13</sup>C NMR spectrum of **3c** in CDCl<sub>3</sub>.

## Mass Spectrum SmartFormula Report

**Analysis Info**  
Analysis Name: G:\Ëÿ%4ÿÔËÆ×\2012 1218\Äµ=Ã±±¼×ÉáAlybq\_yangmeipan\_1.d  
Method: tune\_low 50-500.m  
Sample Name:   
Comment:   
Acquisition Date: 2012/12/18 15:41:14  
Operator: NWU  
Instrument / Ser#: microTOF-Q II 10280

**Acquisition Parameter**

|             |            |                       |           |                  |           |
|-------------|------------|-----------------------|-----------|------------------|-----------|
| Source Type | ESI        | Ion Polarity          | Positive  | Set Nebulizer    | 0.4 Bar   |
| Focus       | Not active | Set Capillary         | 4500 V    | Set Dry Heater   | 180 °C    |
| Scan Begin  | 50 m/z     | Set End Plate Offset  | -500 V    | Set Dry Gas      | 4.0 l/min |
| Scan End    | 3000 m/z   | Set Collision Cell RF | 350.0 Vpp | Set Divert Valve | Source    |

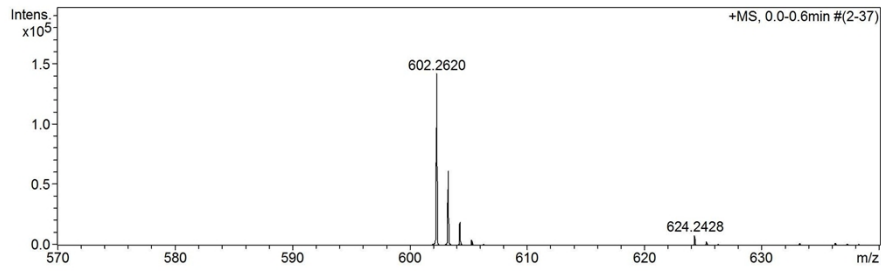

| Meas. m/z | # | Formula             | Score  | m/z      | err [mDa] | err [ppm] | mSigma | rdb  | e <sub>3</sub> Conf | N-Rule |
|-----------|---|---------------------|--------|----------|-----------|-----------|--------|------|---------------------|--------|
| 602.2620  | 1 | C 36 H 36 N 5 O 2 S | 100.00 | 602.2584 | -3.6      | -5.9      | 6.7    | 21.5 | even                | ok     |

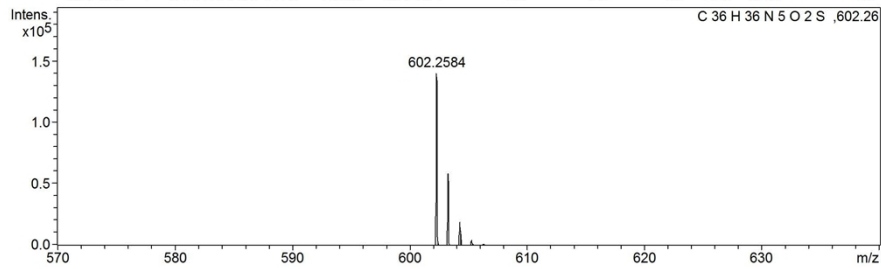

| Meas. m/z | # | Formula | Score | m/z | err [mDa] | err [ppm] | mSigma | rdb | e <sub>3</sub> Conf | N-Rule |
|-----------|---|---------|-------|-----|-----------|-----------|--------|-----|---------------------|--------|
|-----------|---|---------|-------|-----|-----------|-----------|--------|-----|---------------------|--------|

Fig. S17 Mass spectrum of **3a**.

## Mass Spectrum SmartFormula Report

**Analysis Info**  
Analysis Name: G:\Ëÿ%4ÿ\ÔËÆ×\2012 1218\Äbμ×Ä+;¶\Ô¼×Ñδ»üBlybq\_yangmeipan\_2.d  
Method: tune\_low 50-500.m  
Sample Name:  
Comment:  
Acquisition Date: 2012/12/18 15:43:46  
Operator: NWU  
Instrument / Ser#: microTOF-Q II 10280

**Acquisition Parameter**  
Source Type: ESI  
Focus: Not active  
Scan Begin: 50 m/z  
Scan End: 3000 m/z  
Ion Polarity: Positive  
Set Capillary: 4500 V  
Set End Plate Offset: -500 V  
Set Collision Cell RF: 350.0 Vpp  
Set Nebulizer: 0.4 Bar  
Set Dry Heater: 180 °C  
Set Dry Gas: 4.0 l/min  
Set Divert Valve: Source

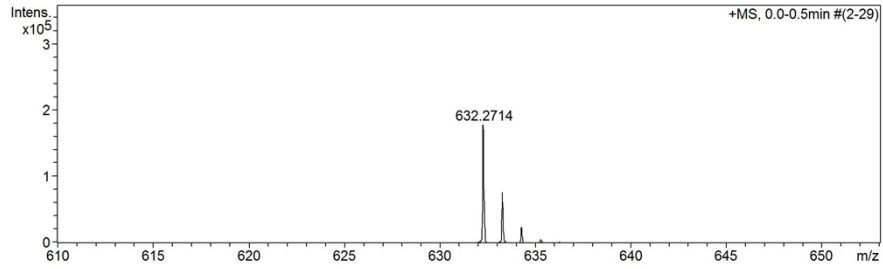

| Meas. m/z | # | Formula             | Score  | m/z      | err [mDa] | err [ppm] | mSigma | rdb  | eÿConf | N-Rule |
|-----------|---|---------------------|--------|----------|-----------|-----------|--------|------|--------|--------|
| 632.2714  | 1 | C 37 H 38 N 5 O 3 S | 100.00 | 632.2690 | -2.4      | -3.9      | 6.5    | 21.5 | even   | ok     |

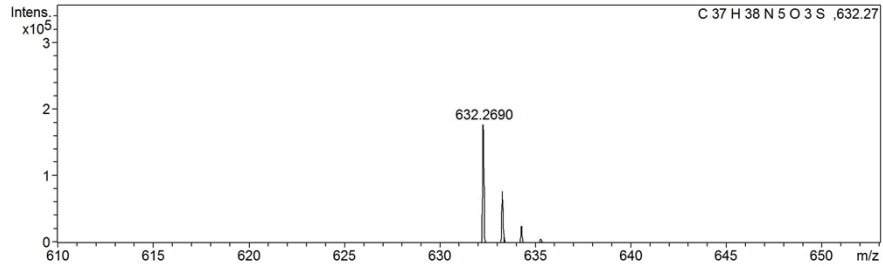

| Meas. m/z | # | Formula | Score | m/z | err [mDa] | err [ppm] | mSigma | rdb | eÿConf | N-Rule |
|-----------|---|---------|-------|-----|-----------|-----------|--------|-----|--------|--------|
|-----------|---|---------|-------|-----|-----------|-----------|--------|-----|--------|--------|

Fig. S18 Mass spectrum of **3b**

## Mass Spectrum SmartFormula Report

**Analysis Info**  
Analysis Name C:\Users\Administrator\Desktop\yangmeipan\ÉúÓÐÓÉÆ×Éý¼Ý1218ÁÐµÄ~¼ãlõ»üClybq\_yangmeipan\_3.d Acquisition Date 2012/12/18 15:48:37  
Method tune\_low 50-500.m Operator NWU  
Sample Name Instrument / Ser# micrOTOF-Q II 10280  
Comment

**Acquisition Parameter**  
Source Type ESI Ion Polarity Positive Set Nebulizer 0.4 Bar  
Focus Not active Set Capillary 4500 V Set Dry Heater 180 °C  
Scan Begin 50 m/z Set End Plate Offset -500 V Set Dry Gas 4.0 l/min  
Scan End 3000 m/z Set Collision Cell RF 350.0 Vpp Set Divert Valve Source

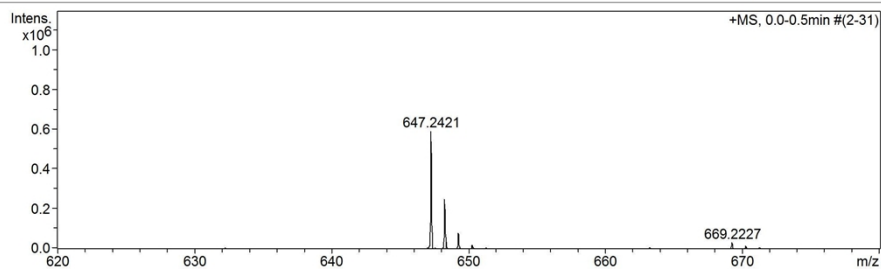

| Meas. m/z | # | Formula                                                         | Score  | m/z      | err [mDa] | err [ppm] | mSigma | rdb  | e <sub>i</sub> Conf | N-Rule |
|-----------|---|-----------------------------------------------------------------|--------|----------|-----------|-----------|--------|------|---------------------|--------|
| 647.2421  | 1 | C <sub>36</sub> H <sub>35</sub> N <sub>6</sub> O <sub>4</sub> S | 100.00 | 647.2435 | 1.4       | 2.2       | 5.3    | 22.5 | even                | ok     |

Intens. x10<sup>6</sup>

C<sub>36</sub>H<sub>35</sub>N<sub>6</sub>O<sub>4</sub>S .647.24

647.2435

m/z

| Meas. m/z | # | Formula | Score | m/z | err [mDa] | err [ppm] | mSigma | rdb | e <sub>i</sub> Conf | N-Rule |
|-----------|---|---------|-------|-----|-----------|-----------|--------|-----|---------------------|--------|
|-----------|---|---------|-------|-----|-----------|-----------|--------|-----|---------------------|--------|

Fig. S19 Mass spectrum of **3c**
